# Supplementary material
Source: PubMed Central journal article supplement (PMC3724350)
Supplement: NIHMS352550-supplement-1_si_001.pdf [file NIHMS352550-supplement-1_si_001.pdf]

## Supporting Information

# Spectroscopic and kinetic characterization of the diheme cytochrome c peroxidase from *Shewanella oneidensis*

*Gökçe Su Pulcu, Katherine E. Frato, Rupal Gupta, Hao-Ru Hsu, George A. Levine,  
Michael P. Hendrich and Sean J. Elliott\**

### Materials and Methods.

*Mutagenesis of So CcP.* Mutagenesis was performed using the QuikChange protocol according to the manufacturer's instructions. Mutations are shown in bold, and reverse primers were the exact reverse and complement of the primers given. The P75T/H81K/E84Q variant was made by first adding the P75T mutation using the primer CGGCGTAGATGCGCTA**ACC**ACGTCAATTGGT. Then, the H81K/E84Q double mutation was added simultaneously using the primer ACGTCAATTGGTCATA**AGTGGCAACAAGGC**. The M219Q/F247N variant was also constructed by step-wise mutation. First, the M219Q mutation was added using the primer CCCGCGGTAGGCGG**TA**CTC**AG**TTTATGAAGATGGGCCTAATTAAAC, followed by addition of the F247N mutation using the primer CGGGTAAGGATGCGGATAAGA**AC**GTGTTTAAGGTACCGACACTGC.

*Lag-phase least-square fitting program.*

```
# optimize_lagphase.py
```

```
# Initialize a dictionary to hold the experimental data
```

```
data = {}  
print data
```

```
f = open (path/datafile)
```

```
for line in f:
```

```
    data_string = str(line)  
    print data_string  
    print len(data_string)  
    if len(data_string)>5 and data_string.split('.')[0].isdigit():  
        t = data_string.split(',')[0]  
        round_time = round(float(t), 1)  
        print t, round_time  
        absorbance = data_string.split(',')[1]  
        print absorbance  
        data[str(round_time)]=absorbance
```

```
f.close()
```

```
print data
```

```
# This function defines the residuals, ie the data minus the model
```

```
def residuals(p, data_dict):
```

```
    t = 0.1  
    CcP_ox = 0.016           #Initialize to the initial peroxidase concentration  
    CytC_initial = 40.40    #Initialize to the initial electron donor concentration  
    CcP_act = 0             #All the peroxidase begins in the oxidized, inactive state  
    CytC_ox = 0            #All the electron donor begins in the reduced state  
    delta_CcP_act = 0  
    delta_CytC = 0  
    CcP_total = float(CcP_ox)  
    # CytC_red_stuck = p[2]  
    CcP_monomer = 0        #All the peroxidase begins in a dimeric state
```

```
# Input rates per second and Kd in uM. **Change these to make the model fit.**
```

```
Kd = 7  
kact_s = p[1]  
k1_s = p[0]  
k_dissoc_s = p[2]        #dissociation of the dimer over time  
curve = []
```

```

# Rates must be per 0.2 seconds to match the time step of integration
kact = float(kact_s)/5.0
k1 = float(k1_s)/5.0
k_dissoc = float(k_dissoc_s)/5.0
CytC_red = float(CytC_initial)

for number in range(2200):
    # Calculate the fraction of CcP (total) bound to CytC5
    fraction_bound = float(CytC_red)/(float(CytC_red) + float(Kd))
    #print 'fraction bound', fraction_bound

    # There is some probability that, once bound, the CcP will activate
    delta_CcP_act = float(kact)*float(fraction_bound)*float(CcP_ox)
    #print 'change in CcP activation', delta_CcP_act
    CcP_monomer += float(CcP_act)*k_dissoc
    CcP_ox -= float(delta_CcP_act)
    CcP_act += float(delta_CcP_act)-float(CcP_act)*k_dissoc
    print 'total inactive and active CcP', CcP_ox, CcP_act, CcP_monomer
    #print CcP_monomer

    # Calculate the amount of CytC(red) used up in this time step
    delta_CytC = float(delta_CcP_act)+ \
        2*float(k1)*float(CcP_act)*float(CytC_red)
    CytC_ox += float(delta_CytC)
    CytC_red -=float(delta_CytC)
    delta_CcP_act = 0

    # Calculate the absorbance at 553
    A = float(CytC_ox)*0.0084 + float(CytC_red)*0.0295
    t_ref = str(round(t, 1))
    curve.append([t_ref,A])
    t += 0.2

# Calculate difference between absorbance in data file and generated by the model
errors = []
for pair in curve:
    try:
        data_value = data_dict[pair[0]]
        errors.append(float(pair[1])-float(data_value))
    except KeyError:
        #print "Got to the end of the data set"
        continue
return errors

# Give an initial set of guesses [k1, kact, k_dissoc]

```

```
p0 = [0.1, 0.01, 0.001]
import numpy

from scipy.optimize import leastsq
plsq = leastsq(residuals, p0[:], args=(data))
print plsq[0]
```

## Results

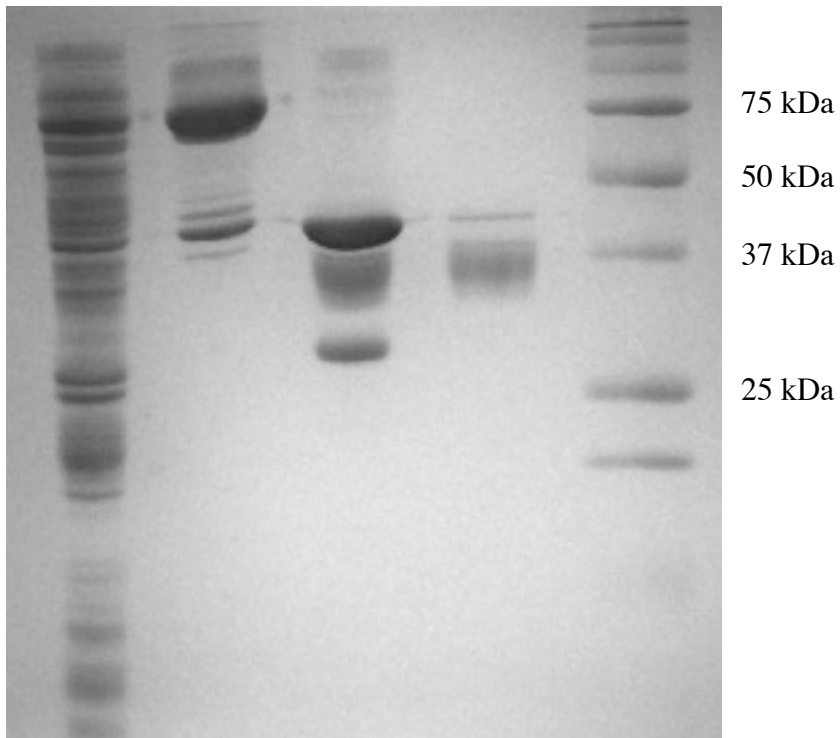

**Figure S1:** Coomassie-stained 16% SDS-PAGE gel of the purification of *So CcP*. From left to right, Lane 1: soluble fraction of the lysate; Lane 2: Flow-through from amylose resin; Lane 3: Flow-through from the amylose column, digested overnight with TEV protease; Lane 4: Sample following Ni-NTA chromatography to remove MBP tag and TEV.

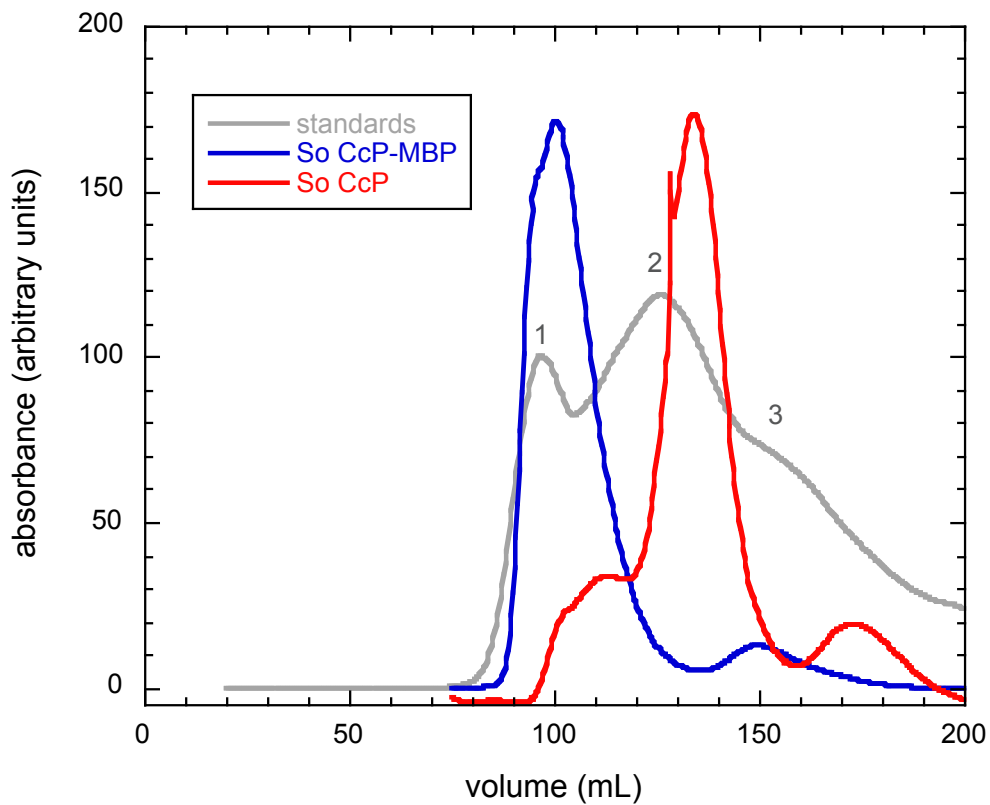

**Figure S2:** Size exclusion chromatography of *So CcP*-MBP (blue) compared to tag-free *So CcP* (red). Grey trace shows molecular weight standards; 1: blue dextran (exclusion volume), 2: albumin (66 kDa), 3: carbonic anhydrase (29 kDa).

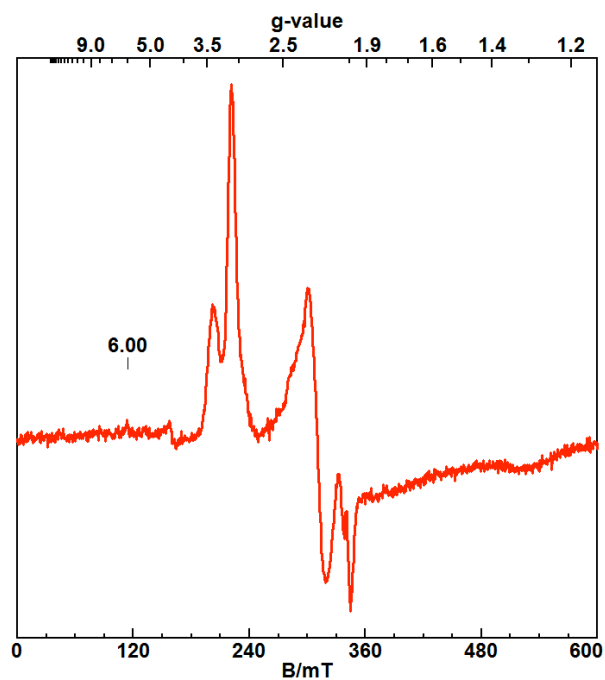

**Figure S3:** EPR spectra of 0.5 mM MBP-CcP in the absence of L-ascorbate. Experiments were conducted with microwave frequency of 9.62 GHz, power of 0.02 mW, and temperature of 7 K.

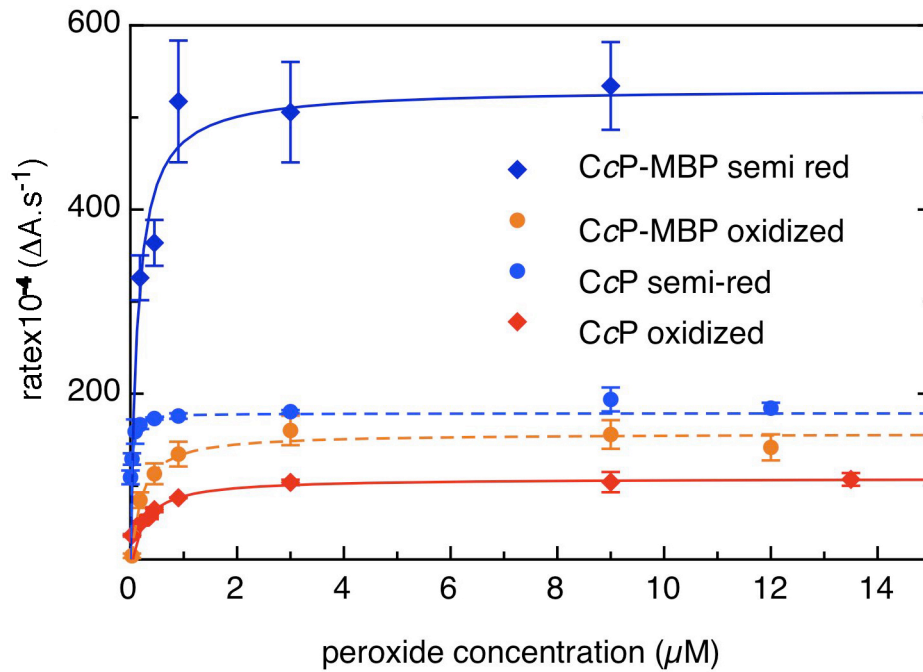

**Figure S4:** Michaelis-Menten analysis of peroxide turnover of *So* CcP-MBP in the semi-reduced (blue, solid) or oxidized (orange, dashed) state, and tag-free *So* CcP in the semi-reduced (blue, dashed) or oxidized (red, solid) state. Assays were conducted with 10 μM horse heart cytochrome c and 5 nM enzyme in buffer containing 5 mM HEPES, 5 mM MES, 10 mM NaCl and 1 mM CaCl<sub>2</sub> at 23°C.

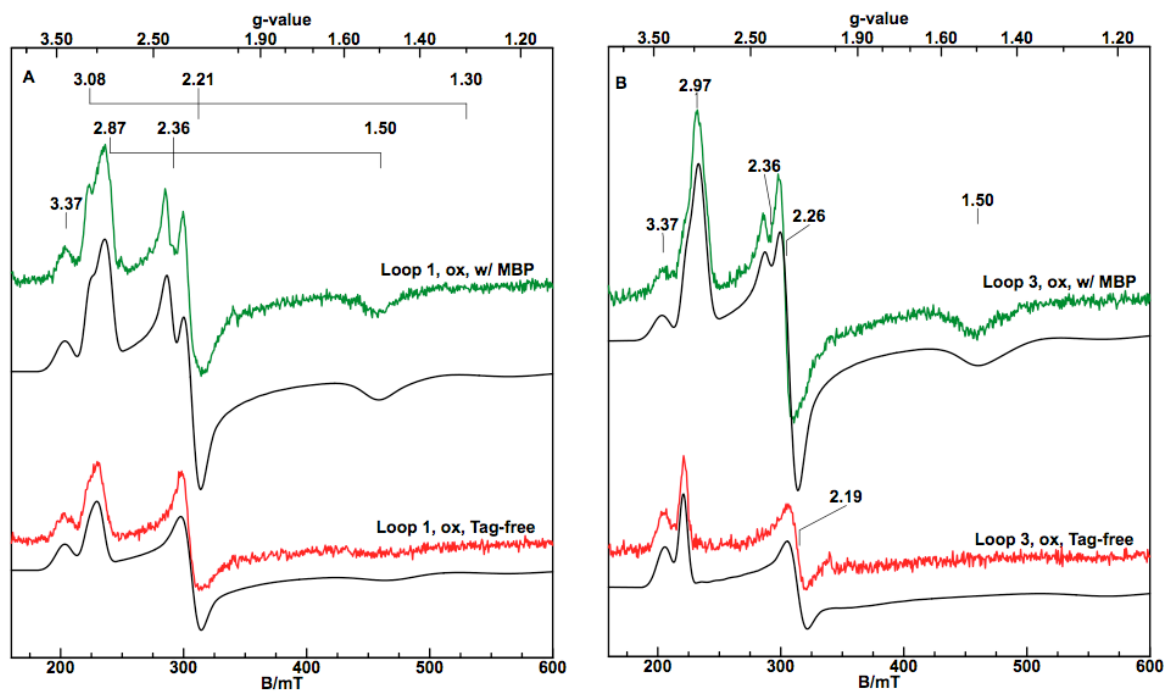

**Figure S5:** (A) EPR characterization of Loop 1 mutants as the oxidized, MBP-fused protein (green) or tag-free/fully oxidized protein (red). Simulations based upon the contributions from states tabulated in Table S1 are shown in black lines. Data were collected as in Figure 4. (B) The analogous EPR spectra for the Loop 3 mutants.

**Table S1:** EPR contributions of the Loop 1 and Loop 3 mutants.

| Heme Species                                     | Amount with respect to total Fe (%) |                     |                      |                                |
|--------------------------------------------------|-------------------------------------|---------------------|----------------------|--------------------------------|
|                                                  | MBP-Loop1 mutant, ox                | Loop1 mut, tag-free | MBP-Loop3 mutant, ox | Loop3 mut, tag-free            |
| H-Heme<br>$g = (3.37, 2.20, 1.50)$               | 21                                  | 29                  | 15                   | 45                             |
| L <sub>1</sub> -Heme<br>$g = (3.08, 2.26, 1.30)$ | 29                                  | 36                  | 27                   | 55<br>$g = (3.12, 2.19, 1.30)$ |
| L <sub>2</sub> -Heme<br>$g = (2.87, 2.36, 1.51)$ | 17                                  | 0                   | 10                   | 0                              |
| TF-Heme<br>$g = (2.97, 2.24, 1.52)$              | 32                                  | 34                  | 48                   | 0                              |
